# Supplementary material for: Response of particle number concentrations to Clean Air Action: Lessons from the first long-term aerosol measurements in a typical urban valley, West China
Source: Copernicus journal article supplement (doi:10.5194/acp-2021-433), 2021-07-15
Supplement: Supplementary file 1 [file acp-2021-433-supplement.pdf]

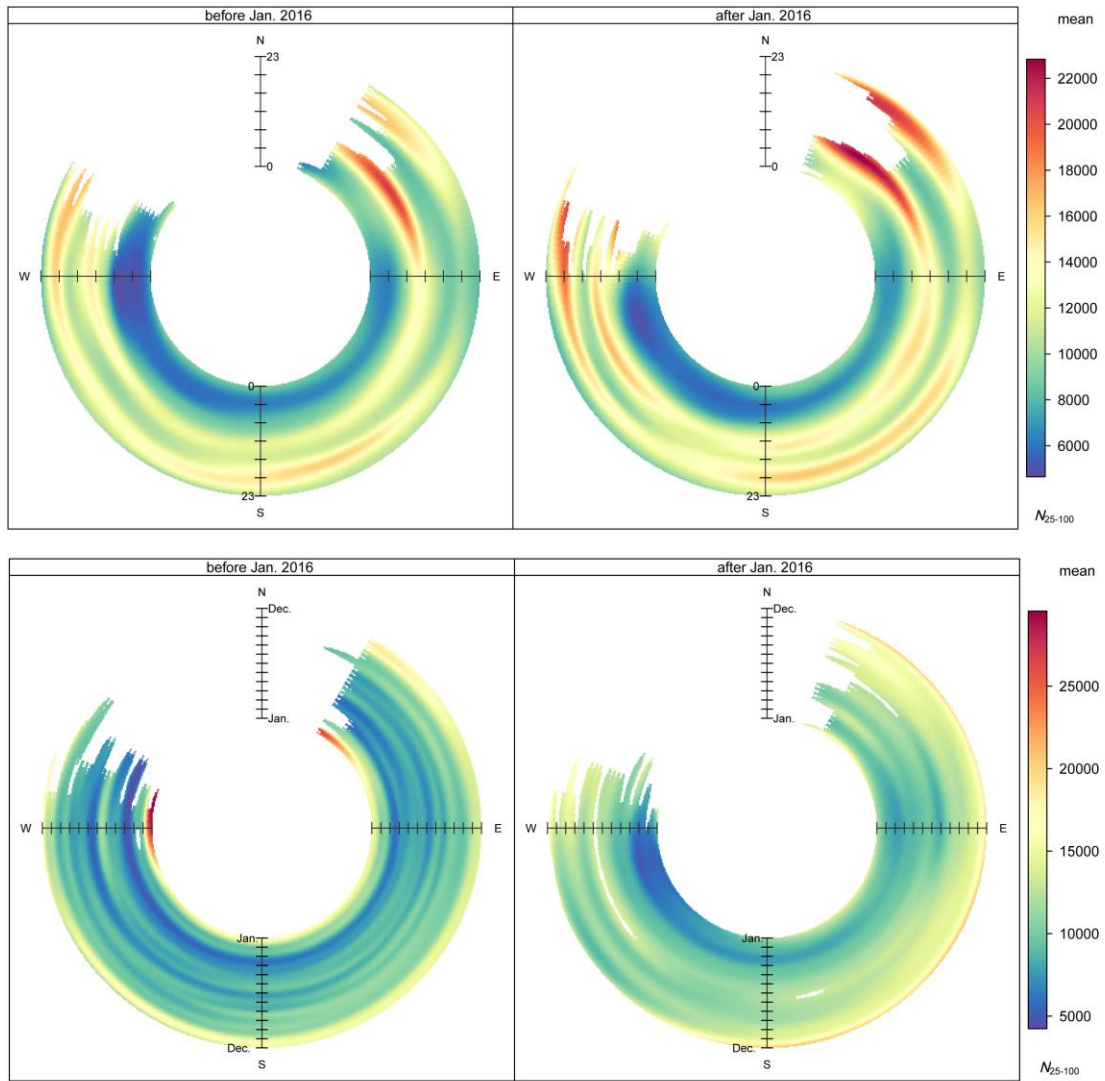

**Figure S1: Mean diurnal (upper panel) and annual (lower panel) variations of particle number in 25-100 size bin ( $N_{25-100}$ ) as wind directions before and after January 2016.**

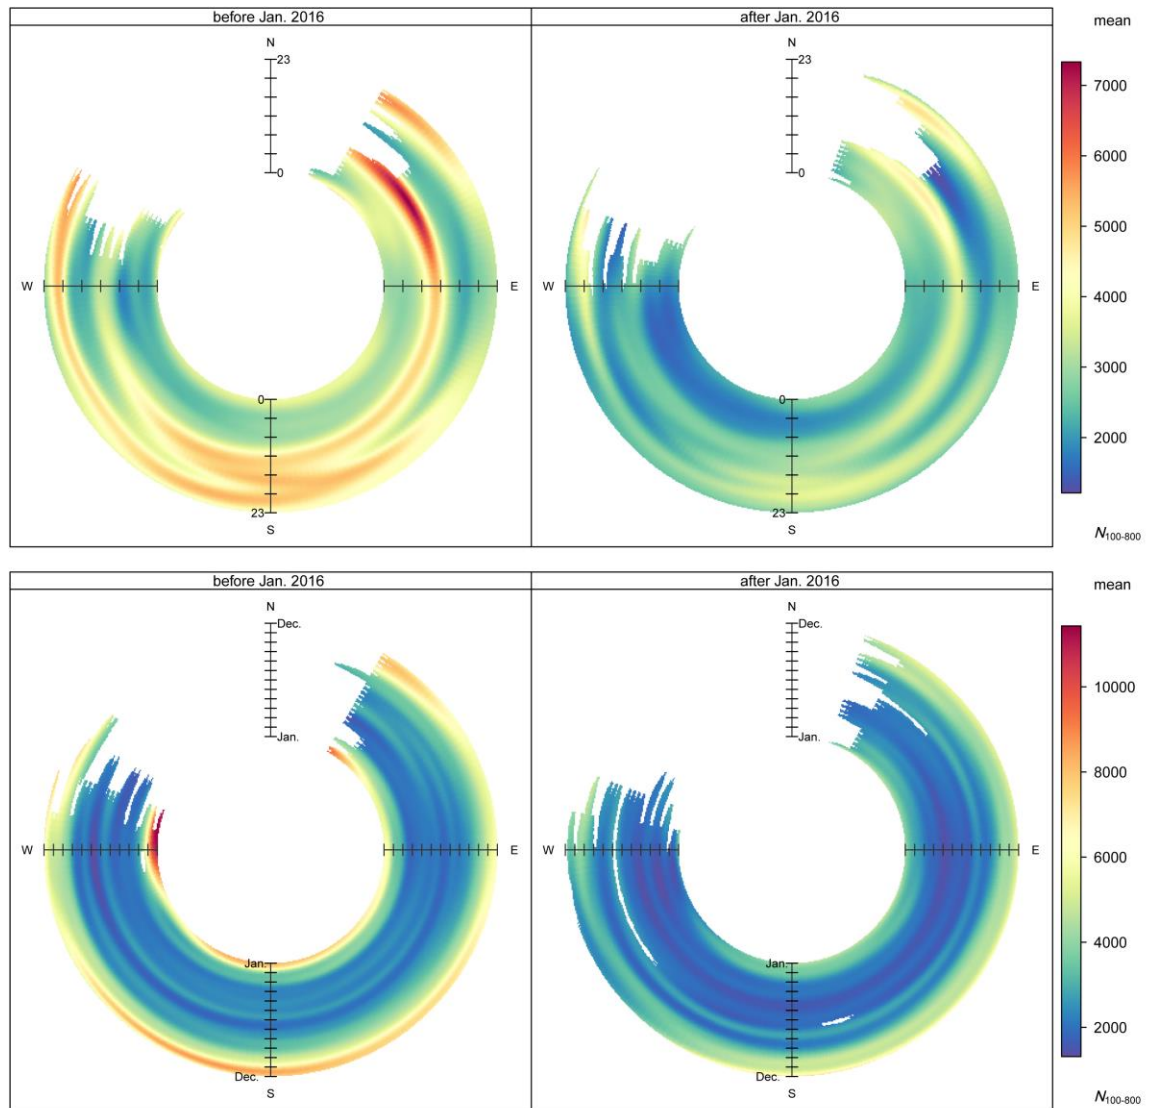

**Figure S2: Mean diurnal (upper panel) and annual (lower panel) variations of particle number in 100-800 size bin ( $N_{100-800}$ ) as wind directions before and after January 2016.**

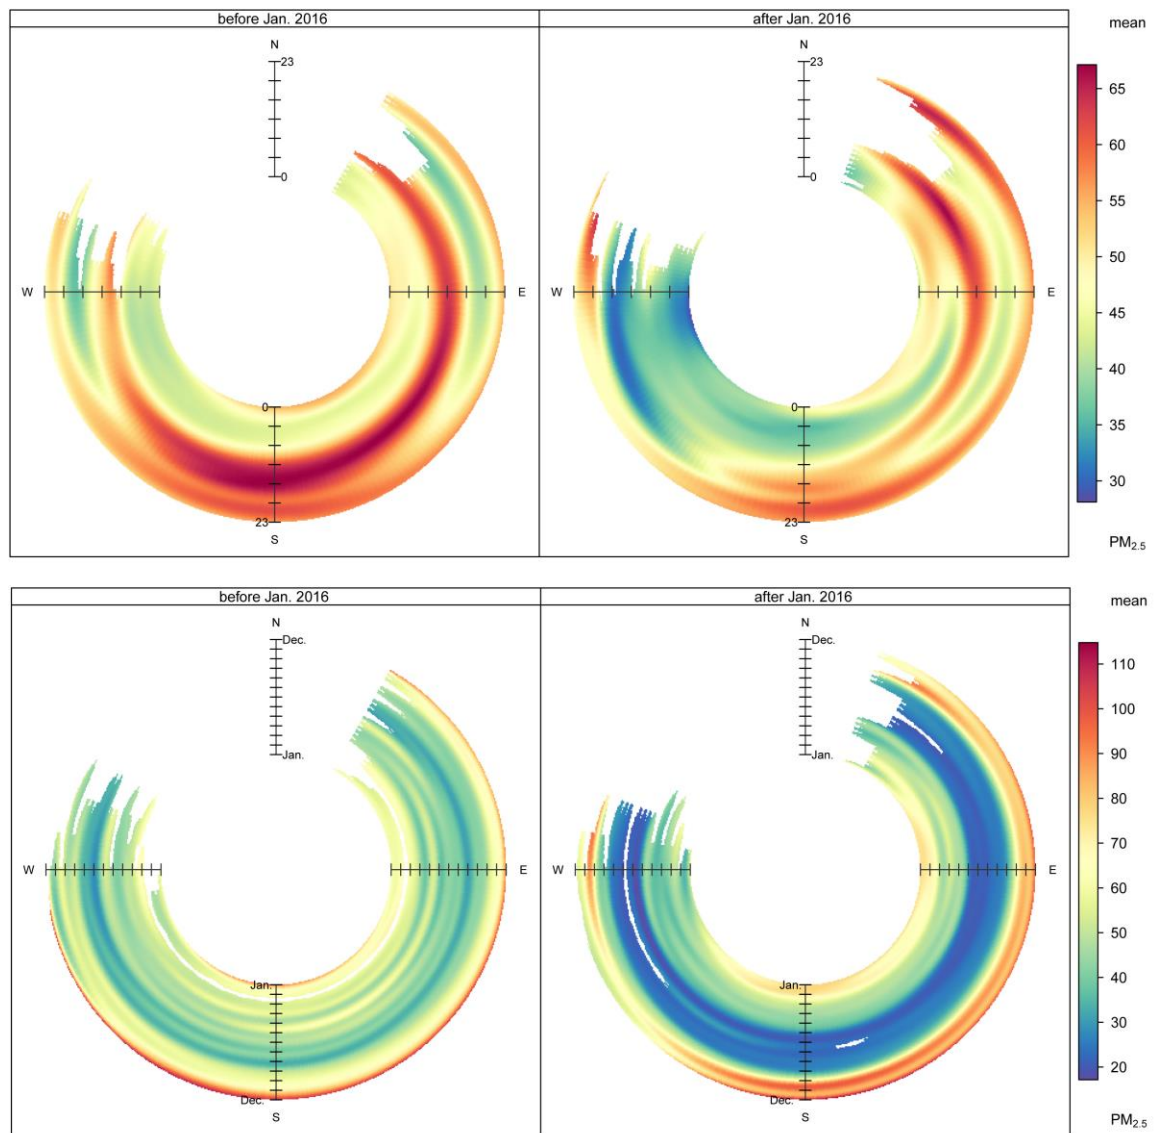

**Figure S3: Mean diurnal (upper panel) and annual (lower panel) variations of PM<sub>2.5</sub> as wind directions before and after January 2016.**

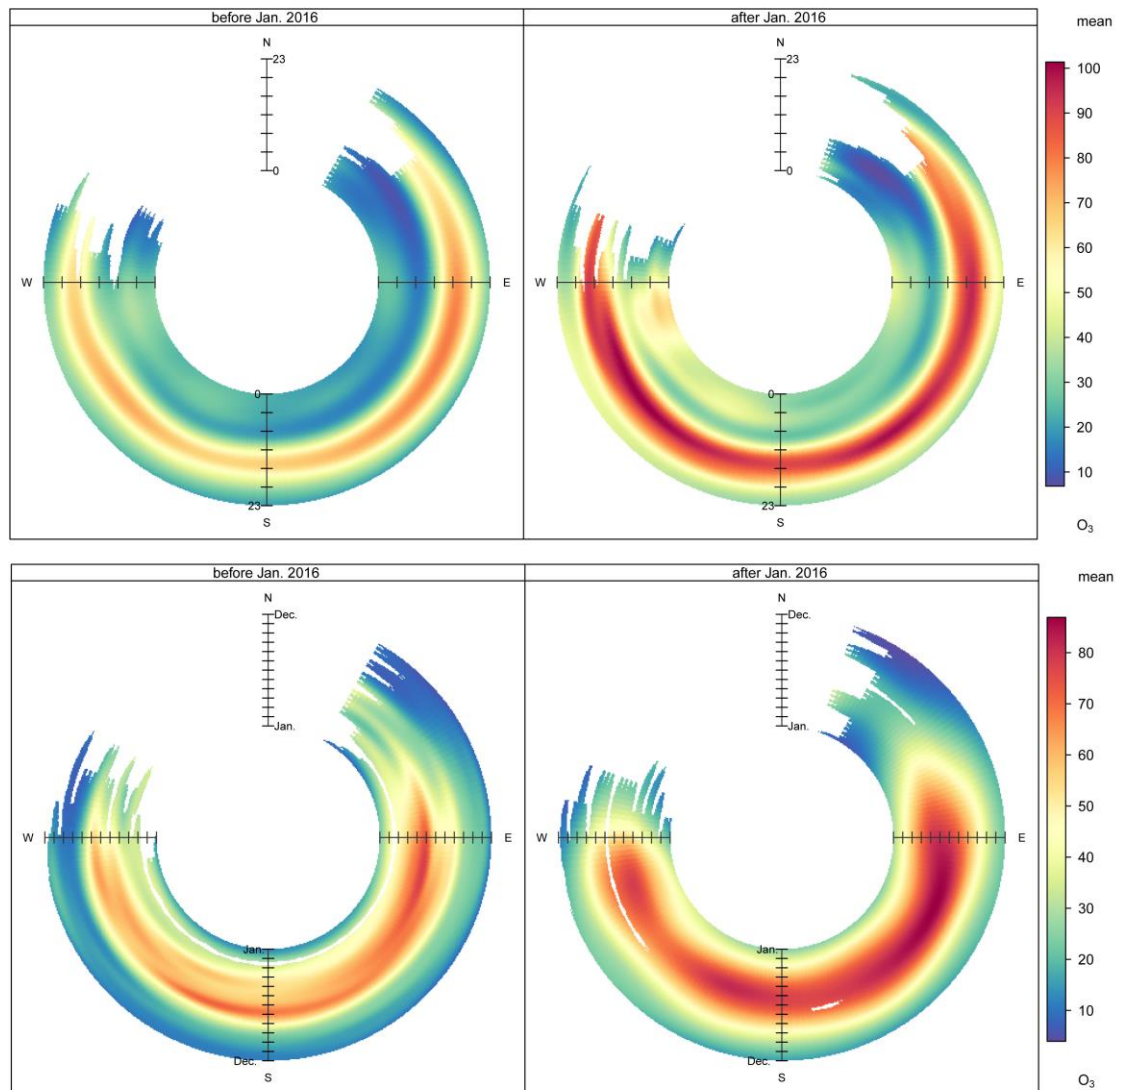

**Figure S4: Mean diurnal (upper panel) and annual (lower panel) variations of O<sub>3</sub> as wind directions before and after January 2016.**

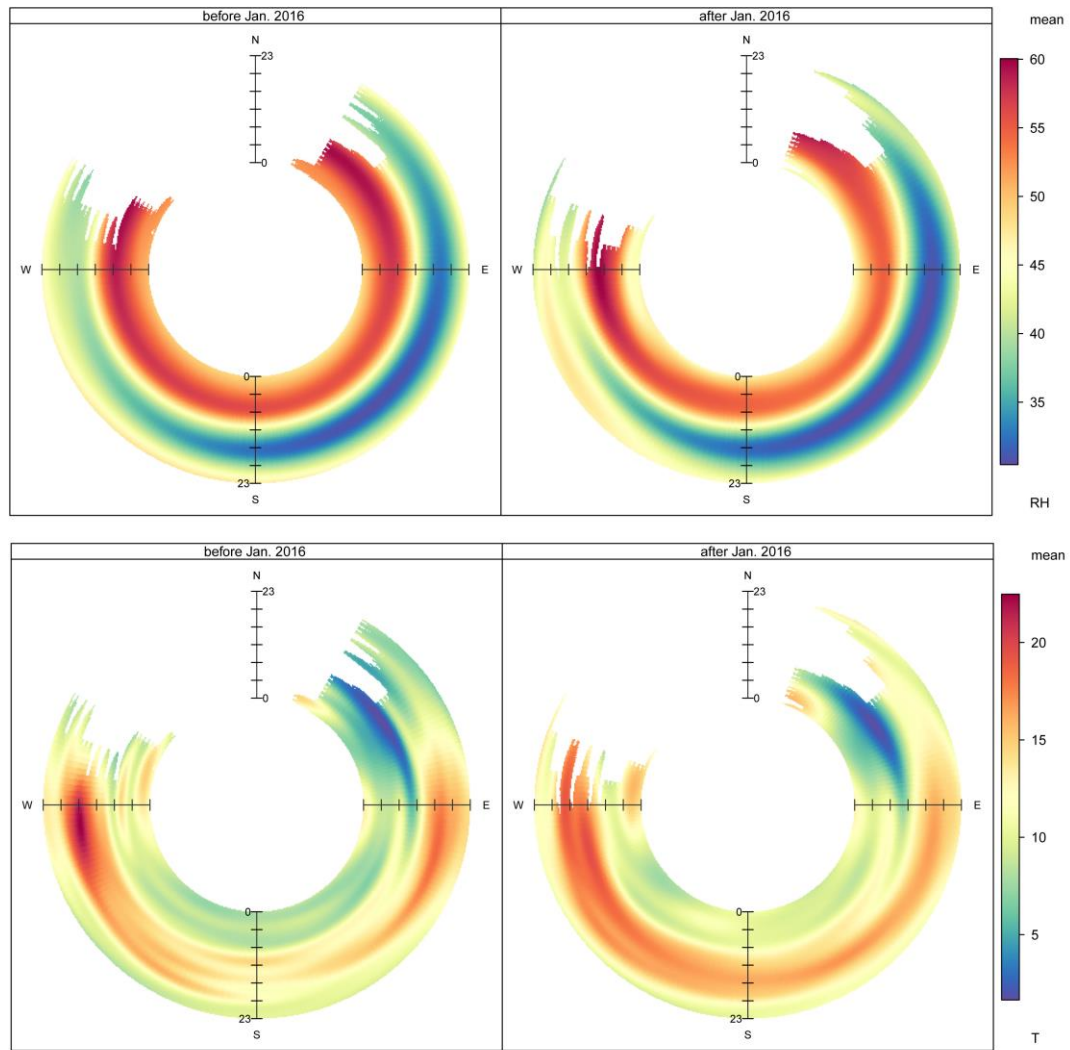

**Figure S5: Mean diurnal variations of relative humidity (RH, upper panel) and temperature (T, lower panel) as wind directions before and after January 2016.**

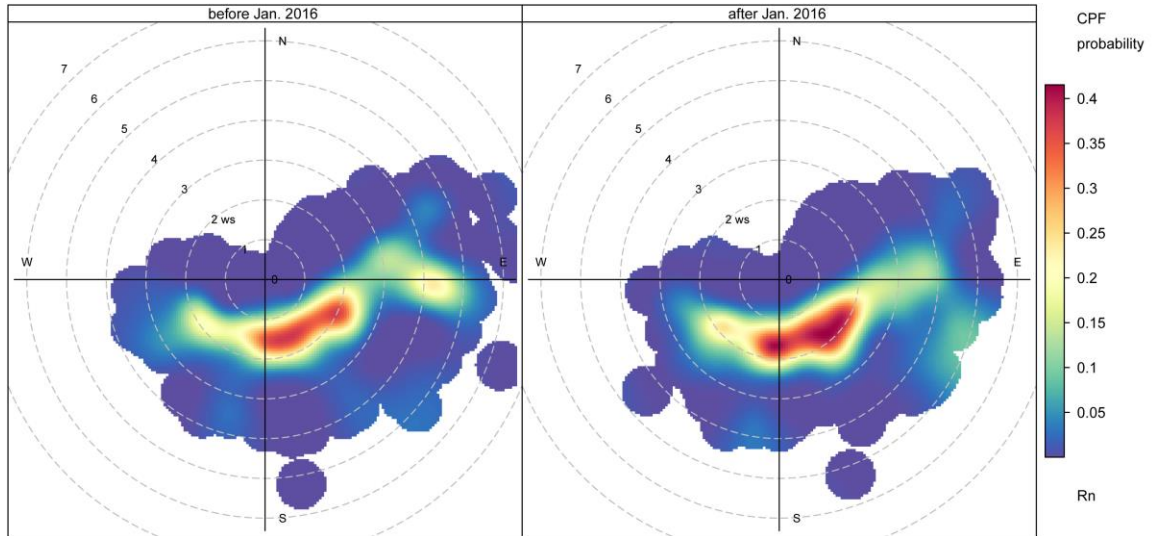

**Figure S6: Polar plot of net radiation (Rn) based on the CPF function before and after January 2016.**

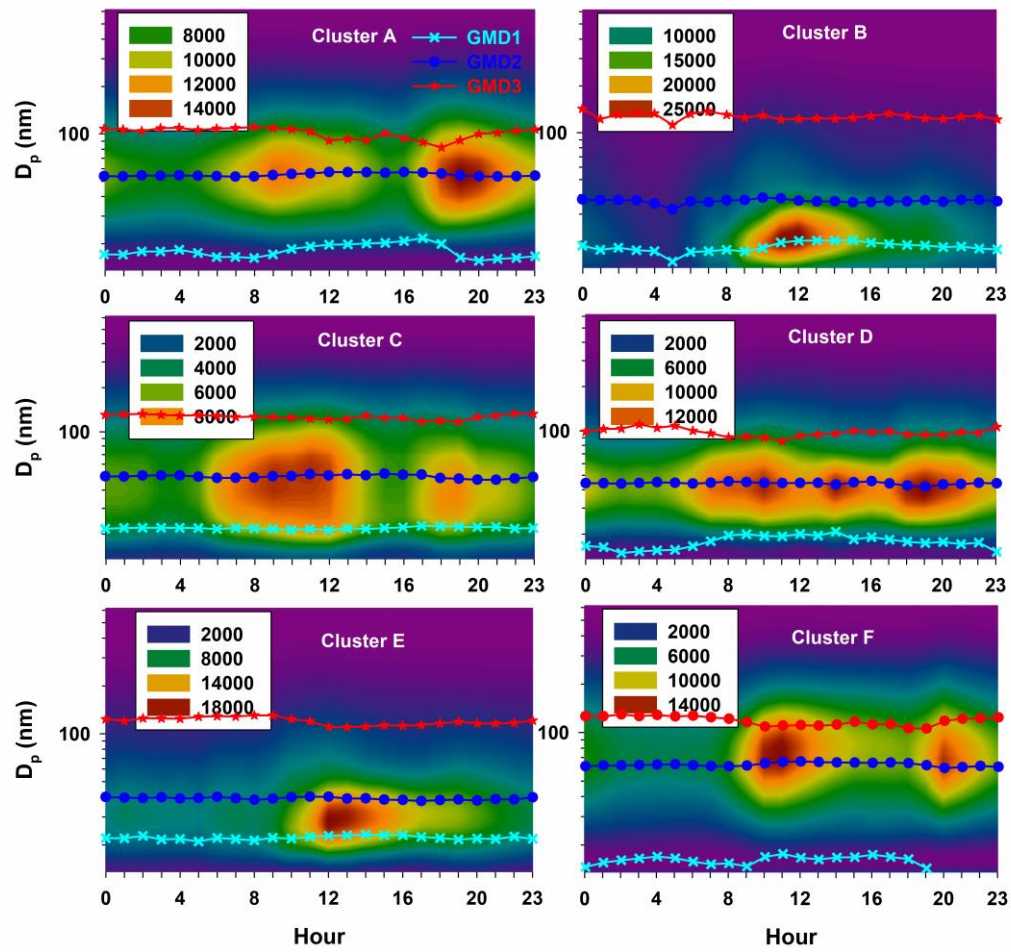

Figure S7: Averagely diurnal variations of particle number size distributions and geometric median diameter (GMD) of the three modes for Clusters A-F.

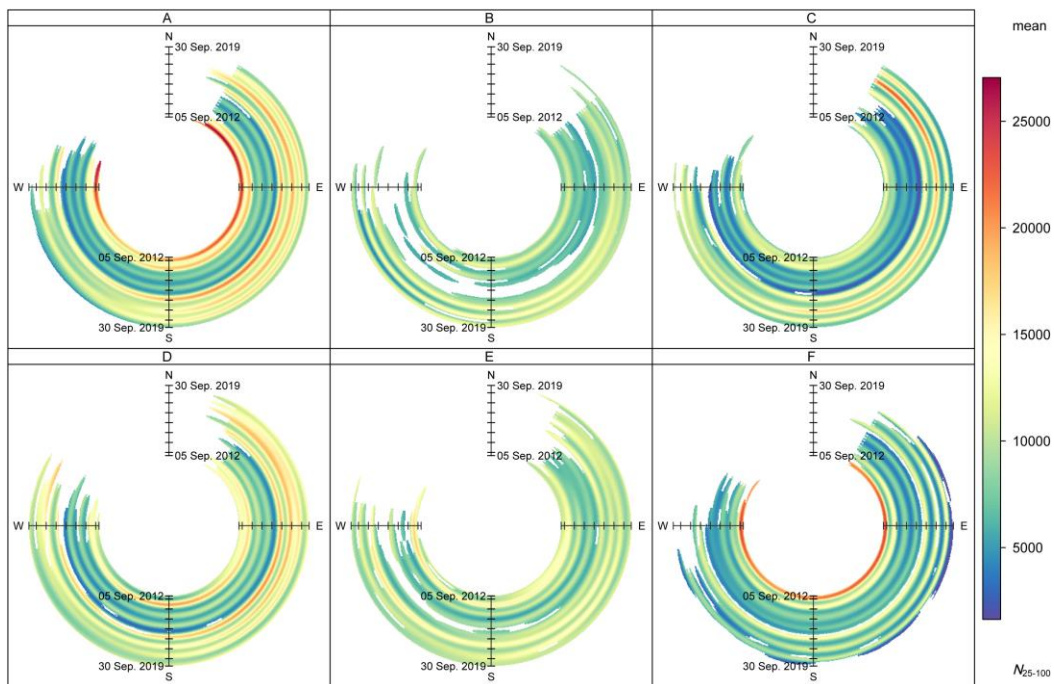

**Figure S8: Trends of daily mean number of particles in Aitken mode ( $N_{25-100}$ ) as wind directions for each cluster during the entire measurement campaign.**

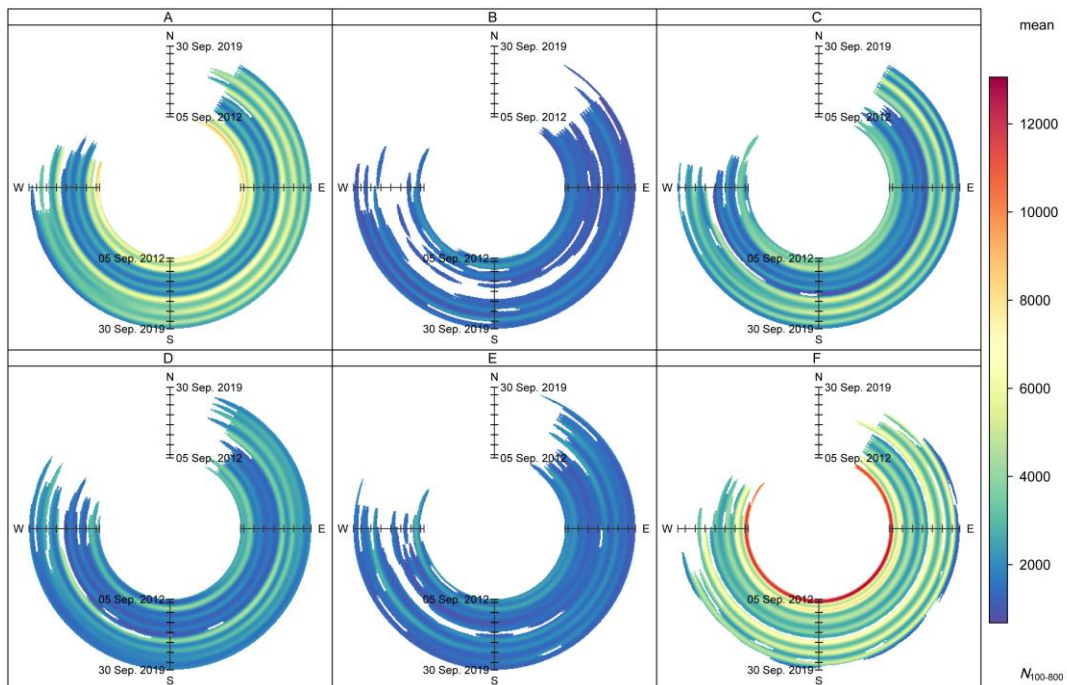

**Figure S9: It is the same as Figure S8 but for accumulation mode ( $N_{100-800}$ ).**



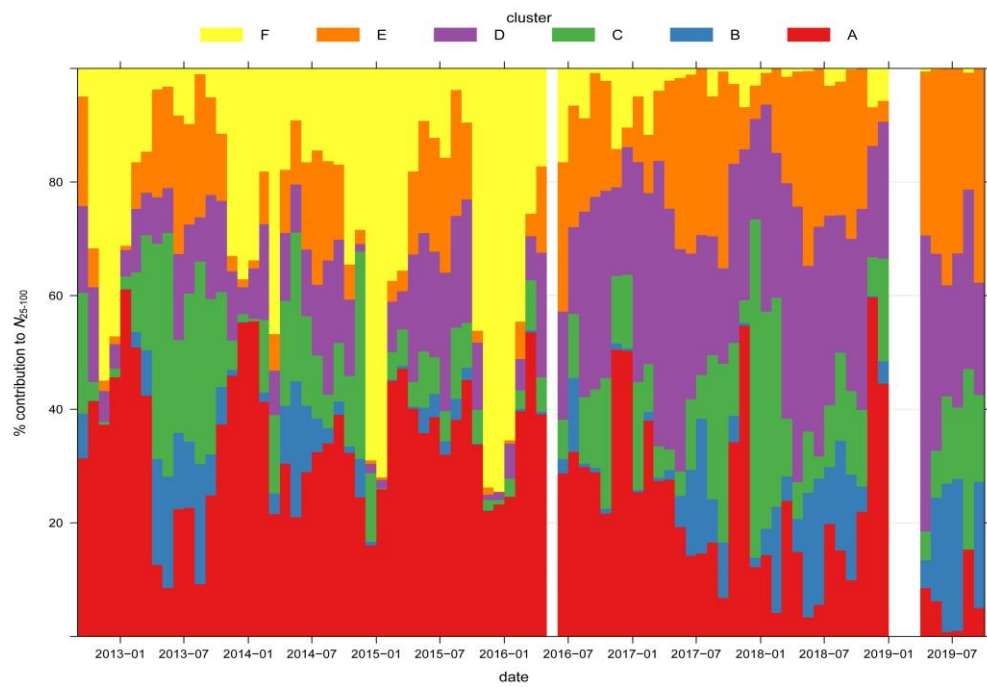

**Figure S10: Variations of contribution of each cluster to monthly averaged  $N_{25-100}$  during the entire measurement campaign.**

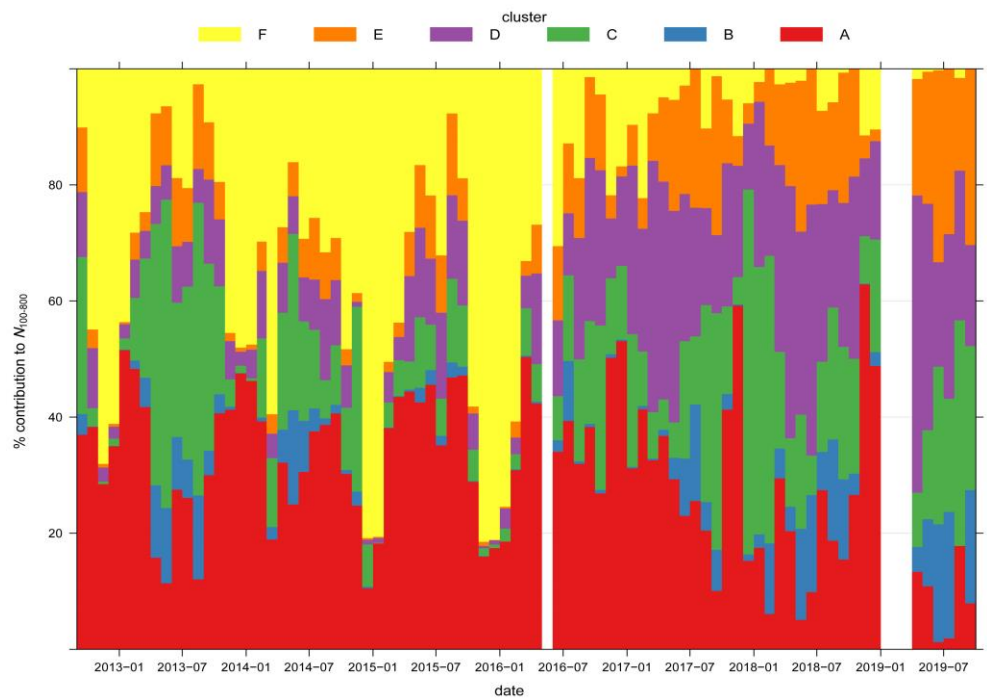

**Figure S11: It is the same as Figure S10 but for monthly averaged  $N_{100-800}$ .**

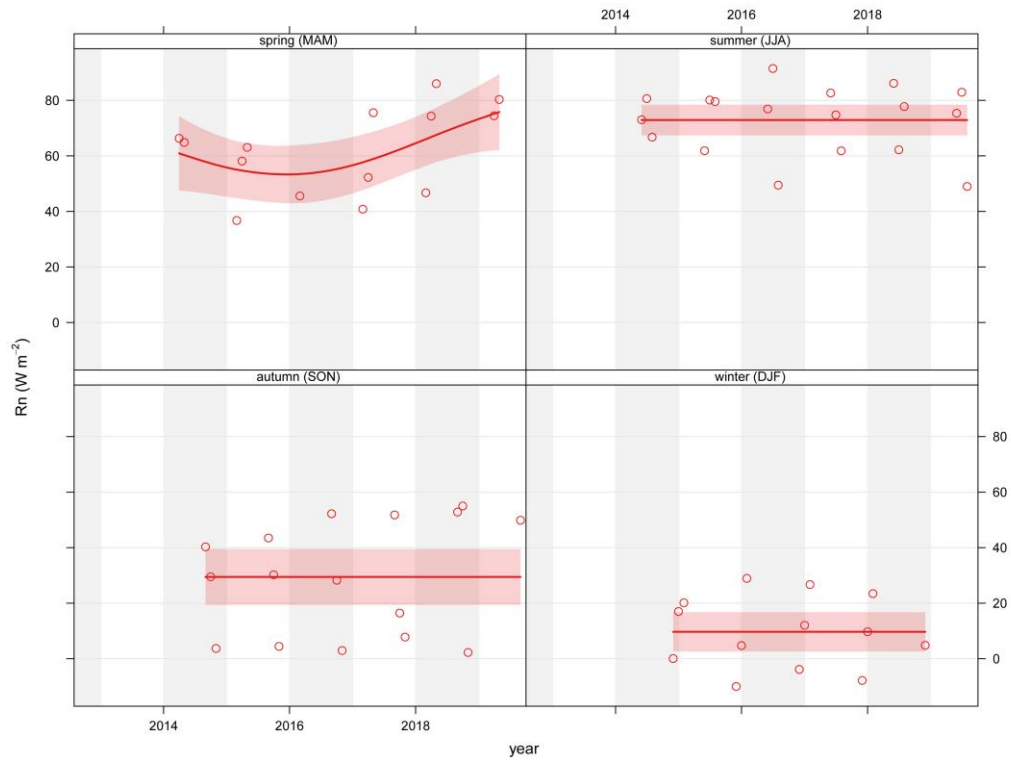

**Figure S12: Inter-annual variations of monthly average  $R_n$  in four seasons. The monthly average concentrations are split by year and season. The smooth line is essentially determined using Generalized Additive Model, and the shading shows the estimated 95% confidence intervals.**
